# Supplementary material for: The Role of Chromosomal Instability and Epigenetics in Colorectal Cancers Lackingβ-Catenin/TCF Regulated Transcription
Source: Hindawi journal article supplement (doi:10.1155/2016/6089658), 2016-01-01
Supplement: f1 [file 6089658.f1.pdf]

**Supplementary Figure SF1:** Representative examples from the immunohistochemistry of colon cancers. A, membranous  $\beta$ -catenin; B, nuclear  $\beta$ -catenin; C, carcinoma negative for DGKI; D, carcinoma positive for DGKI; E, carcinoma negative for OBCML; F, carcinoma positive for OBCML; G, carcinoma negative for GLIPR1; H, carcinoma positive for GLIPR1. Original magnification x200.

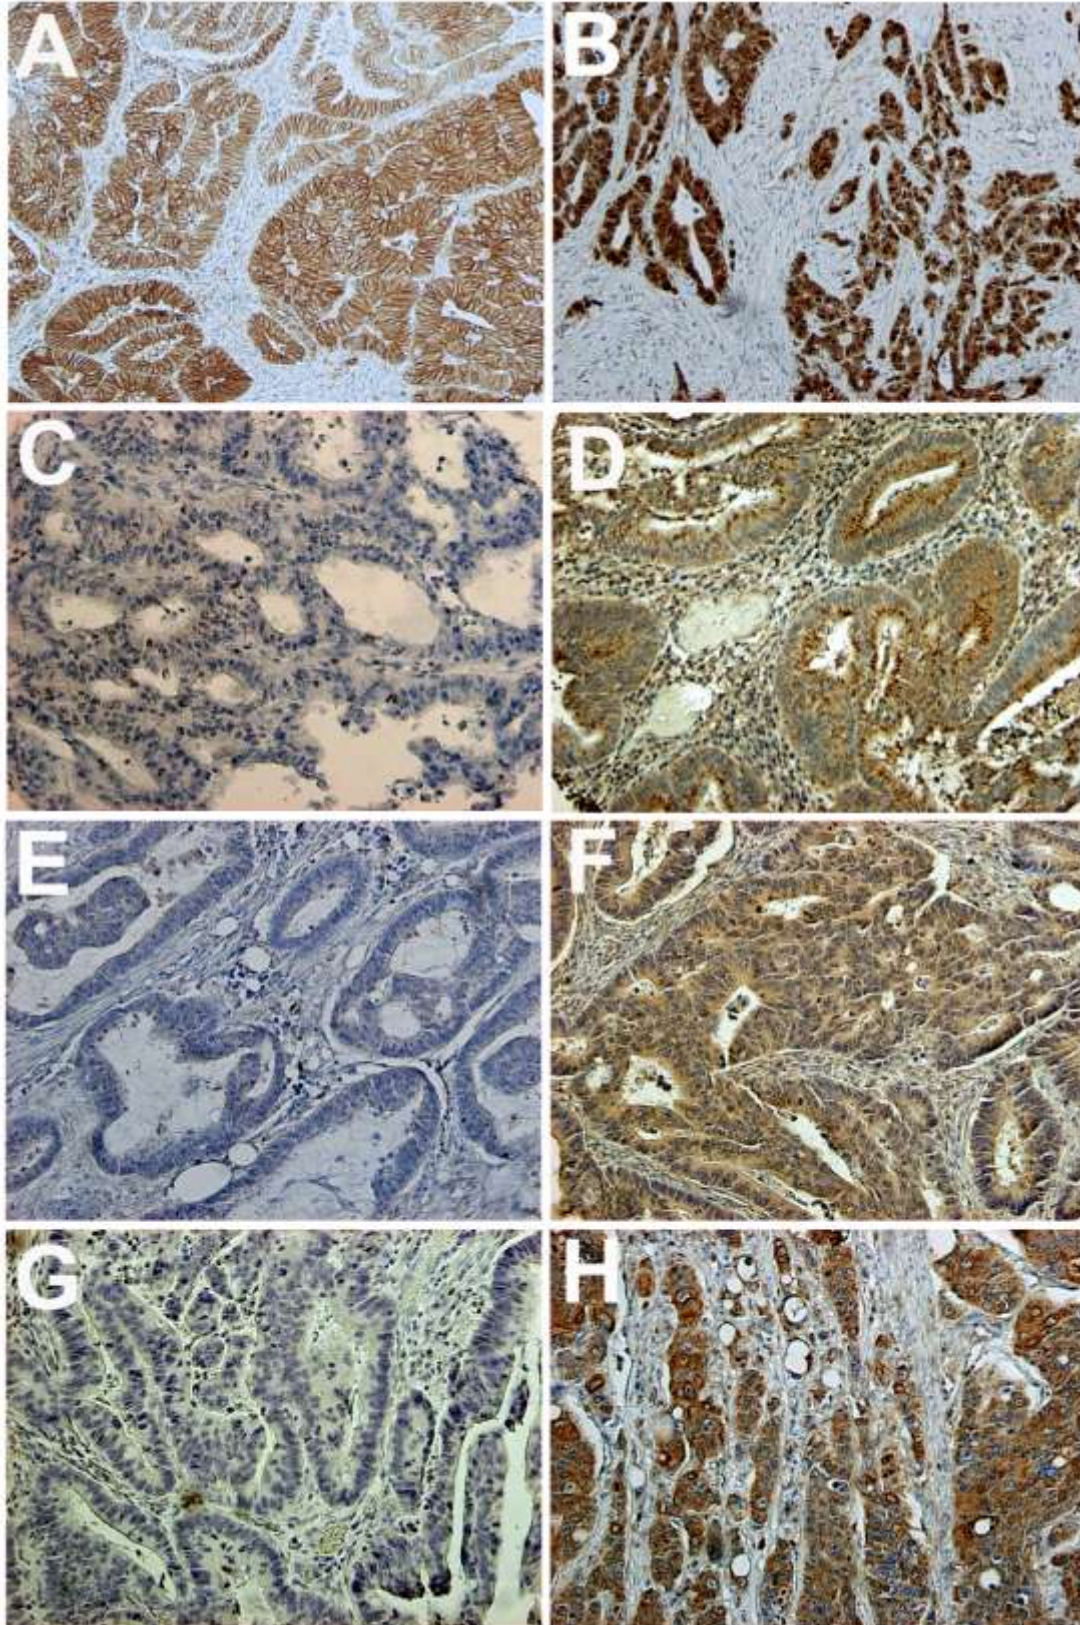

**Supplementary table S1. Characteristics of the dinucleotide repeat markers used for LOH analyses and the obtained LOH results**

|    | marker   | chr      | nearby* differentially expressed gene(s) | LOH % in carcinoma with membranous $\beta$ -catenin | LOH % in carcinoma with nuclear $\beta$ -catenin | Overall LOH % in carcinoma |
|----|----------|----------|------------------------------------------|-----------------------------------------------------|--------------------------------------------------|----------------------------|
| 2  | D1S2635  | 1q23.2   | IFI16, RGS4, DEDD                        | 44                                                  | 44                                               | 44                         |
| 1  | D1S245   | 1q32.2   | ELF3, GOS2                               | 25                                                  | 40                                               | 33                         |
| 3  | D2S2278  | 2p25.1   | KLF11, LPIN1, EPCAM                      | 43                                                  | 13                                               | 27                         |
| 4  | D2S2264  | 2q11.2   | AFF3                                     | 20                                                  | 60                                               | 47                         |
| 5  | D2S2380  | 2q24.3   | IFIH1, GALNT3                            | 0                                                   | 0                                                | 0                          |
| 6  | D2S326   | 2q31.1   | ITGA6                                    | 29                                                  | 40                                               | 35                         |
| 7  | D4S3042  | 4q21.1   | EREG, ANXA3                              | 33                                                  | 38                                               | 36                         |
| 8  | D4S426   | 4q35.2   | FAT1, TLR3                               | 25                                                  | 40                                               | 33                         |
| 9  | D5S2111  | 5q35.2   | PDLIM7                                   | 20                                                  | 43                                               | 42                         |
| 10 | D6S1640  | 6p24.3   | DSP                                      | 17                                                  | 30                                               | 25                         |
| 11 | D6S1617  | 6p25.1   | SERPINB1                                 | 43                                                  | 25                                               | 33                         |
| 12 | D7S2564  | 7p15.2   | NFE2L3                                   | 75                                                  | 63                                               | 67                         |
| 13 | D7S662   | 7q22.1   | MUC12, DGKI                              | 83                                                  | 67                                               | 73                         |
| 14 | D8S552   | 8p22     | MTUS1, DLC1                              | 38                                                  | 70                                               | 56                         |
| 15 | D8S514   | 8q24.13  | ST3GAL1                                  | 40                                                  | 29                                               | 33                         |
| 16 | D9S259   | 9p21.2   | ADAMTSL1                                 | 50                                                  | 50                                               | 50                         |
| 17 | D9S288   | 9p24.2   | PDCD1LG2                                 | 33                                                  | 13                                               | 21                         |
| 18 | D9S290   | 9q24.1   | NUP188                                   | 20                                                  | 30                                               | 27                         |
| 19 | D9S158   | 9q34.3   | ANAPC2, MARPL41, RAPGEF1                 | 29                                                  | 40                                               | 33                         |
| 20 | D11S928  | 11p15.1  | PLEKHA7                                  | 0                                                   | 33                                               | 17                         |
| 21 | D11S4159 | 11q22.3  | IL18                                     | 33                                                  | 57                                               | 50                         |
| 22 | D11S4167 | 11q24.1  | SORL1, OPCML                             | 20                                                  | 50                                               | 38                         |
| 23 | D12S1688 | 12p12.1  | RECQL                                    | 43                                                  | 25                                               | 32                         |
| 24 | D12S1728 | 12p12.3  | RASSF8                                   | 40                                                  | 71                                               | 53                         |
| 25 | D12S355  | 12q14.1  | NAB2, DCTN2, GLIPR1                      | 33                                                  | 56                                               | 50                         |
| 26 | D15S983  | 15q23    | CORO2B                                   | 29                                                  | 43                                               | 36                         |
| 27 | D17S1353 | 17p13.1  | ASGR1, CLDN1                             | 71                                                  | 80                                               | 76                         |
| 28 | D19S219  | 19q13.32 | ERCC1, KLK10                             | 14                                                  | 33                                               | 22                         |
| 29 | D20S874  | 20q1.21  | ID1                                      | 57                                                  | 73                                               | 67                         |
| 30 | D20S171  | 20q13.32 | SLC17A9, ARFGAP1/SMAP1                   | 60                                                  | 60                                               | 60                         |
| 31 | D22S272  | 22q13.1  | RBFOX2                                   | 33                                                  | 33                                               | 33                         |

\* within 1 megabase on average

**Supplementary table S2: The Antibodies used for immunohistochemistry analysis**

|   | <b>Antibody</b> | <b>Host/clonality</b> | <b>Dilution</b> | <b>Antibody supplier</b> |
|---|-----------------|-----------------------|-----------------|--------------------------|
| 1 | IFI16           | Mouse<br>monoclonal   | 1:125           | Abnova Corp              |
| 2 | RGS4            | Rabbit<br>polyclonal  | 1:1000          | Atlas-Sigma              |
| 3 | MCTP1           | Rabbit<br>polyclonal  | 1:200           | Atlas-Sigma              |
| 4 | DGKI            | Rabbit<br>polyclonal  | 1:180           | Abgent                   |
| 5 | OBCAM/OPCML     | Rabbit<br>polyclonal  | 1:75            | R&D                      |
| 6 | GLIPR1          | Rabbit<br>polyclonal  | 1:100           | Atlas-Sigma              |
|   |                 |                       |                 |                          |

Supplementary Table S3A. Sequences for bisulphite sequencing primers

| Gene         | Orientation          | Reference  | Sequence (5' - 3')        | Product | Ta <sup>a</sup> |
|--------------|----------------------|------------|---------------------------|---------|-----------------|
| CMTM3_F      | forward              | This study | TAGGTTAGGAAGTTTTGTAGATGTG | 261     | 52              |
| CMTM3_R      | reverse              | This study | ATACCCCTCTCTTTTCTTAAAAACC |         |                 |
| DGKI_F       | forward              | This study | GGTTTTGGTTTTTTTAGITTTTA   | 372     | 56              |
| DGKI_R       | reverse              | This study | ACAAATAACAACCCCTTCCC      |         |                 |
| EpCAM_F      | forward              | This study | GAAGGTTTTTTGTTTGTGTTGTATT | 298     | 56              |
| EpCAM_R      | reverse              | This study | AAAAAATAAATAAACCCTCCCTCCC |         |                 |
| OPCML_F      | forward              | (1)        | CCACCCCGCCCTCTGTAGGGGAAGC | 250     | 56              |
| OPCML_R      | reverse              | (1)        | GTGGCGGTCAGGGATGGAGCTGCTG |         |                 |
| KLK10_F      | forward              | This study | GGTGTGTTGGTGGATTAGAGTTG   | 290     | 52              |
| KLK10_R      | reverse              | This study | TCCCTCTAAAACCTCAAAAAAATCA |         |                 |
| DLC1_i4_F    | forward <sup>b</sup> | This study | TTAGGTGAGTTATTGGGTTGTA    | 409     | 52              |
| DLC1_i4_BGS1 | forward <sup>b</sup> | (2)        | GAAAGTTAAAGATAAGGTTATTTG  | 564     | 50              |
| DLC1_i4_BGS2 | reverse              | (2)        | CCAAATAACATCCAAAACCTCTAA  |         |                 |
| DLC1_F       | forward <sup>b</sup> | This study | TAAAACCTACRACCCAAACAAC    | 171     | 52              |
| DLC1_BGSb1   | forward <sup>b</sup> | (3)        | CCAAATAAATACCTTATAACCTTTA | 458     | 54              |
| DLC1_BGSb2   | reverse              | (3)        | GAGGTGYGTTTATGTTTTGGT     |         |                 |

<sup>a</sup> Annealing temperature

<sup>b</sup> Either of the two forward primers was combined with the reverse primer for the gene.

(1) Niskakoski, A. *et al.*, unpublished data (2014)

(2) Low, JSW *et al.* (2011) A novel isoform of the 8p22 tumor suppressor gene *DLC1* suppresses tumor growth and is frequently silenced in multiple common tumors. *Oncogene*, **16**, 1923-1935.

(3) Seng, TJ *et al.* (2007) The major 8p22 tumor suppressor *DLC1* is frequently silenced by methylation in both endemic and sporadic nasopharyngeal, esophageal, and cervical carcinomas, and inhibits tumor cell colony formation. *Oncogene*, **26**, 934-944.



Supplementary Table S4.

Normal tissue-based threshold values for the detection of hypermethylation at gene loci in tumor tissues.

| Gene           | Normal tissue      | Average methylation dosage ratio ( $\bar{X}_{Dm}$ ) | Standard deviation | $\bar{X}_{Dm} + 1$ standard deviation |
|----------------|--------------------|-----------------------------------------------------|--------------------|---------------------------------------|
| <i>CMTM3</i>   | colorectal mucosa* | 0.12                                                | 0.08               | 0.20                                  |
| <i>DGKI</i>    | colorectal mucosa* | 0.13                                                | 0.06               | 0.19                                  |
| <i>EpCAM</i>   | colorectal mucosa* | 0.13                                                | 0.05               | 0.18                                  |
| <i>OPCML</i>   | colorectal mucosa* | 0.20                                                | 0.10               | 0.30                                  |
| <i>KLK10</i>   | colorectal mucosa* | 0.09                                                | 0.06               | 0.15                                  |
| <i>DLC1</i>    | colorectal mucosa* | 0.09                                                | 0.04               | 0.13                                  |
| <i>DLC1_i4</i> | colorectal mucosa* | 0.06                                                | 0.04               | 0.10                                  |

‡  $\bar{X}_{Dm} + 1$  SD or technical threshold ( $Dm = 0.15$ )<sup>a</sup>, whichever was higher

\* Corresponding to the sporadic MSI, sporadic MSS, and Lynch groups combined (n = 110)

Supplementary Table S5. *APC*, *CTNNB1* and *CIMP* status in the cell lines (all microsatellite unstable) as per the published literature and our laboratory data.

| Cell line | <i>APC</i>                                      | <i>CTNNB1</i>                                    | <i>CIMP</i> <sup>a</sup> status                                            |
|-----------|-------------------------------------------------|--------------------------------------------------|----------------------------------------------------------------------------|
| RKO       | Not found                                       | Not found                                        | Positive (Ahmed et al., 2013; Joensuu et al., 2008; Mouradov et al., 2014) |
| HCA7      | mutant (Abdel-Rahman et al., 2008)              | Not found                                        | Positive (Joensuu et al., 2008; Mouradov et al., 2014)                     |
| KM12      | mutant (Abdel-Rahman et al., 2008)              | Not found                                        | Positive (Joensuu et al., 2008; Mouradov et al., 2014)                     |
| HCT15     | Mutant (Rowan et al., 2000)                     | Not found                                        | Positive (Ahmed et al., 2013; Joensuu et al., 2008; Mouradov et al., 2014) |
| HCT116    | Not found                                       | Mutant (Morin et al., 1997; Sparks et al., 1998) | Positive (Ahmed et al., 2013; Joensuu et al., 2008; Mouradov et al., 2014) |
| LIM1215   | Not found                                       | Mutant (Sparks et al., 1998)                     | Negative (Joensuu et al., 2008; Mouradov et al., 2014)                     |
| LoVo      | Mutant (Huang et al., 1996; Morin et al., 1997) | Not found                                        | Negative (Ahmed et al., 2013; Joensuu et al., 2008; Mouradov et al., 2014) |
| SW48      | Not found                                       | Mutant (Morin et al., 1997; Sparks et al., 1998) | Positive (Ahmed et al., 2013; Joensuu et al., 2008; Mouradov et al., 2014) |

<sup>a</sup>CIMP, CpG island methylator phenotype.

## References

- Abdel-Rahman, W.M., Kalinina, J., Shoman, S., Eissa, S., Ollikainen, M., Elomaa, O., Eliseenkova, A.V., Butzow, R., Mohammadi, M., Peltomaki, P., 2008. Somatic FGF9 mutations in colorectal and endometrial carcinomas associated with membranous beta-catenin. *Hum Mutat* 29, 390-397.
- Ahmed, D., Eide, P.W., Eilertsen, I.A., Danielsen, S.A., Eknaes, M., Hektoen, M., Lind, G.E., Lothe, R.A., 2013. Epigenetic and genetic features of 24 colon cancer cell lines. *Oncogenesis* 2, e71.
- Huang, J., Papadopoulos, N., McKinley, A.J., Farrington, S.M., Curtis, L.J., Wyllie, A.H., Zheng, S., Willson, J.K.V., Markowitz, S.D., Morin, P., Kinzler, K.W., Vogelstein, B., Dunlop, M.G., 1996. *APC* mutations in colorectal tumors with mismatch repair deficiency. *Proc. Natl. Acad. Sci. USA* 93, 9049-9054.
- Joensuu, E.I., Abdel-Rahman, W.M., Ollikainen, M., Ruosaari, S., Knuutila, S., Peltomaki, P., 2008. Epigenetic signatures of familial cancer are characteristic of tumor type and family category. *Cancer Res* 68, 4597-4605.

- Morin, P.J., Sparks, A.B., Korinek, V., Barker, N., Clevers, H., Vogelstein, B., Kinzler, K.W., 1997. Activation of beta-catenin-Tcf signaling in colon cancer by mutations in beta-catenin or APC. *Science* 275, 1787-1790.
- Mouradov, D., Sloggett, C., Jorissen, R.N., Love, C.G., Li, S., Burgess, A.W., Arango, D., Strausberg, R.L., Buchanan, D., Wormald, S., O'Connor, L., Wilding, J.L., Bicknell, D., Tomlinson, I.P., Bodmer, W.F., Mariadason, J.M., Sieber, O.M., 2014. Colorectal cancer cell lines are representative models of the main molecular subtypes of primary cancer. *Cancer Res* 74, 3238-3247.
- Rowan, A.J., Lamlum, H., Ilyas, M., Wheeler, J., Straub, J., Papadopoulou, A., Bicknell, D., Bodmer, W.F., Tomlinson, I.P.M., 2000. APC mutations in sporadic colorectal tumors: A mutational "hotspot" and interdependence of the "two hits". *Proc. Natl. Acad. Sci. USA* 97, 3352-3357.
- Sparks, A.B., Morin, P.J., Vogelstein, B., Kinzler, K.W., 1998. Mutational analysis of the APC/beta-catenin/Tcf pathway in colorectal cancer. *Cancer Res.* 58, 1130-1134.



**Supplementary table S6. Differentially expressed genes in RKO vs all other cell lines and normal colon samples**

|                                                                                  | <b>FC (abs)</b> | <b>Gene Symbol</b> | <b>Gene Title</b>                                                                             |
|----------------------------------------------------------------------------------|-----------------|--------------------|-----------------------------------------------------------------------------------------------|
| <b>Genes upregulated in RKO vs all other cell lines and normal colon samples</b> |                 |                    |                                                                                               |
| 1                                                                                | 2545164.0       | FEZ2               | fasciculation and elongation protein zeta 2 (zygin II)                                        |
| 2                                                                                | 436.1           | BCL2A1             | BCL2-related protein A1                                                                       |
| 3                                                                                | 151.9           | SERPINE1           | serpin peptidase inhibitor, clade E (nexin, plasminogen activator inhibitor type 1), member 1 |
| 4                                                                                | 143.28          | G0S2               | G0/G1switch 2                                                                                 |
| 5                                                                                | 118.87          | MAP1LC3C           | microtubule-associated protein 1 light chain 3 gamma                                          |
| 6                                                                                | 111.83          | STC1               | stanniocalcin 1                                                                               |
| 7                                                                                | 88.86           | HGF                | hepatocyte growth factor (hepapoietin A; scatter factor)                                      |
| 8                                                                                | 82.83           | LOC645984          | uncharacterized LOC645984                                                                     |
| 9                                                                                | 73.49           | RGS4               | regulator of G-protein signaling 4                                                            |
| 10                                                                               | 58.22           | ZEB1               | zinc finger E-box binding homeobox 1                                                          |
| 11                                                                               | 46.92           | IFI16              | interferon, gamma-inducible protein 16                                                        |
| 12                                                                               | 44.94           | GFPT2              | glutamine-fructose-6-phosphate transaminase 2                                                 |
| 13                                                                               | 44.94           | LOC100130938       | uncharacterized LOC100130938                                                                  |
| 14                                                                               | 43.98           | LOC152225          | uncharacterized LOC152225                                                                     |
| 15                                                                               | 42.42           | IQCG               | IQ motif containing G                                                                         |
| 16                                                                               | 41.31           | ZNF883             | zinc finger protein 883                                                                       |
| 17                                                                               | 39.73           | MCTP1              | multiple C2 domains, transmembrane 1                                                          |
| 18                                                                               | 38.50           | CACNA2D1           | calcium channel, voltage-dependent, alpha 2/delta subunit 1                                   |
| 19                                                                               | 36.91           | LCP1               | lymphocyte cytosolic protein 1 (L-plastin)                                                    |
| 20                                                                               | 29.76           | SPHK1              | sphingosine kinase 1                                                                          |
| 21                                                                               | 26.93           | LOC100505562       | uncharacterized LOC100505562                                                                  |
| 22                                                                               | 26.49           | ZNF300             | zinc finger protein 300                                                                       |
| 23                                                                               | 26.43           | CLEC11A            | C-type lectin domain family 11, member A                                                      |
| 24                                                                               | 23.01           | RGMB               | RGM domain family, member B                                                                   |
| 25                                                                               | 22.15           | SPOCD1             | SPOC domain containing 1                                                                      |
| 26                                                                               | 20.26           | CMTM3              | CKLF-like MARVEL transmembrane domain containing 3                                            |
| 27                                                                               | 19.31           | CD274              | CD274 molecule                                                                                |
| 28                                                                               | 18.79           | ZNF529             | zinc finger protein 529                                                                       |
| 29                                                                               | 17.33           | ZNF438             | zinc finger protein 438                                                                       |
| 30                                                                               | 17.14           | ARHGAP22           | Rho GTPase activating protein 22                                                              |
| 31                                                                               | 16.95           | ADAMTSL1           | ADAMTS-like 1                                                                                 |
| 32                                                                               | 16.61           | SEMA3D             | sema domain, immunoglobulin domain (Ig), short basic domain, secreted, (semaphorin) 3D        |
| 33                                                                               | 16.48           | TMEM156            | transmembrane protein 156                                                                     |
| 34                                                                               | 15.41           | LTBP2              | latent transforming growth factor beta binding protein 2                                      |
| 35                                                                               | 15.25           | MCL1               | myeloid cell leukemia sequence 1 (BCL2-related)                                               |
| 36                                                                               | 15.15           | C2CD2              | C2 calcium-dependent domain containing 2                                                      |

|    |       |              |                                                                                                                                 |
|----|-------|--------------|---------------------------------------------------------------------------------------------------------------------------------|
| 37 | 14.33 | LAMA1        | laminin, alpha 1                                                                                                                |
| 38 | 14.22 | PTPN7        | protein tyrosine phosphatase, non-receptor type 7                                                                               |
| 39 | 13.61 | PEA15        | phosphoprotein enriched in astrocytes 15                                                                                        |
| 40 | 12.99 | SPRY4        | sprouty homolog 4 (Drosophila)                                                                                                  |
| 41 | 12.80 | ST6GALNAC4   | ST6 (alpha-N-acetyl-neuraminyl-2,3-beta-galactosyl-1,3)-N-acetylgalactosaminide alpha-2,6-sialyltransferase 4                   |
| 42 | 12.11 | AXL          | AXL receptor tyrosine kinase                                                                                                    |
| 43 | 12.02 | PPP1R18      | protein phosphatase 1, regulatory subunit 18                                                                                    |
| 44 | 11.74 | CORO2B       | coronin, actin binding protein, 2B                                                                                              |
| 45 | 11.71 | SCARF1       | scavenger receptor class F, member 1                                                                                            |
| 46 | 11.63 | FKBP15       | FK506 binding protein 15, 133kDa                                                                                                |
| 47 | 11.42 | SMTN         | smoothelin                                                                                                                      |
| 48 | 11.38 | CBLB         | Cbl proto-oncogene, E3 ubiquitin protein ligase B                                                                               |
| 49 | 11.20 | GAP43        | growth associated protein 43                                                                                                    |
| 50 | 10.87 | PHC2         | polyhomeotic homolog 2 (Drosophila)                                                                                             |
| 51 | 10.72 | ZNF474       | zinc finger protein 474                                                                                                         |
| 52 | 10.46 | NCS1         | neuronal calcium sensor 1                                                                                                       |
| 53 | 10.16 | ENTPD7       | ectonucleoside triphosphate diphosphohydrolase 7                                                                                |
| 54 | 10.10 | GLIPR1       | GLI pathogenesis-related 1                                                                                                      |
| 55 | 9.51  | B4GALT6      | UDP-Gal:betaGlcNAc beta 1,4- galactosyltransferase, polypeptide 6                                                               |
| 56 | 9.46  | C1orf110     | chromosome 1 open reading frame 110                                                                                             |
| 57 | 8.96  | LAIR2        | leukocyte-associated immunoglobulin-like receptor 2                                                                             |
| 58 | 8.70  | SMAGP        | small cell adhesion glycoprotein                                                                                                |
| 59 | 8.62  | SHC1         | SHC (Src homology 2 domain containing) transforming protein 1                                                                   |
| 60 | 8.42  | MSANTD3      | Myb/SANT-like DNA-binding domain containing 3                                                                                   |
| 61 | 8.40  | ASPHD1       | aspartate beta-hydroxylase domain containing 1                                                                                  |
| 62 | 8.00  | PPP1R3B      | protein phosphatase 1, regulatory subunit 3B                                                                                    |
| 63 | 7.97  | LOC339290    | uncharacterized LOC339290                                                                                                       |
| 64 | 7.86  | ZNF643       | zinc finger protein 643                                                                                                         |
| 65 | 7.65  | DGKI         | diacylglycerol kinase, iota                                                                                                     |
| 66 | 7.50  | DAPK3        | death-associated protein kinase 3                                                                                               |
| 67 | 7.45  | LPIN1        | lipin 1                                                                                                                         |
| 68 | 7.44  | DYRK3        | dual-specificity tyrosine-(Y)-phosphorylation regulated kinase 3                                                                |
| 69 | 7.44  | ELK3         | ELK3, ETS-domain protein (SRF accessory protein 2)                                                                              |
| 70 | 7.41  | TAGLN        | transgelin                                                                                                                      |
| 71 | 7.20  | MAPKAP1      | mitogen-activated protein kinase associated protein 1                                                                           |
| 72 | 7.15  | LOC100130776 | uncharacterized LOC100130776                                                                                                    |
| 73 | 7.13  | TTN          | titin                                                                                                                           |
| 74 | 7.01  | XIST         | X (inactive)-specific transcript (non-protein coding)                                                                           |
| 75 | 6.93  | ERCC1        | excision repair cross-complementing rodent repair deficiency, complementation group 1 (includes overlapping antisense sequence) |
| 76 | 6.92  | PPP1R15A     | protein phosphatase 1, regulatory subunit 15A                                                                                   |
| 77 | 6.88  | SGIP1        | SH3-domain GRB2-like (endophilin) interacting protein 1                                                                         |
| 78 | 6.85  | NAV3         | neuron navigator 3                                                                                                              |
| 79 | 6.80  | RAB3B        | RAB3B, member RAS oncogene family                                                                                               |

|     |      |              |                                                                   |
|-----|------|--------------|-------------------------------------------------------------------|
| 80  | 6.79 | DMRT2        | doublesex and mab-3 related transcription factor 2                |
| 81  | 6.78 | UAP1         | UDP-N-acetylglucosamine pyrophosphorylase 1                       |
| 82  | 6.59 | RASSF8       | Ras association (RalGDS/AF-6) domain family (N-terminal) member 8 |
| 83  | 6.58 | ITGA5        | integrin, alpha 5 (fibronectin receptor, alpha polypeptide)       |
| 84  | 6.08 | SH2B3        | SH2B adaptor protein 3                                            |
| 85  | 6.06 | LOC100506267 | uncharacterized LOC100506267                                      |
| 86  | 5.95 | NHLH2        | nescient helix loop helix 2                                       |
| 87  | 5.94 | IL11         | interleukin 11                                                    |
| 88  | 5.88 | CCR10        | chemokine (C-C motif) receptor 10                                 |
| 89  | 5.76 | SH3GLB2      | SH3-domain GRB2-like endophilin B2                                |
| 90  | 5.69 | ASGR1        | asialoglycoprotein receptor 1                                     |
| 91  | 5.69 | LY96         | lymphocyte antigen 96                                             |
| 92  | 5.60 | SRFBP1       | serum response factor binding protein 1                           |
| 93  | 5.56 | TMEM194B     | transmembrane protein 194B                                        |
| 94  | 5.41 | LOC100126784 | uncharacterized LOC100126784                                      |
| 95  | 5.39 | HEY1         | hairy/enhancer-of-split related with YRPW motif 1                 |
| 96  | 5.38 | PDLIM7       | PDZ and LIM domain 7 (enigma)                                     |
| 97  | 5.35 | SH3BP5L      | SH3-binding domain protein 5-like                                 |
| 98  | 5.35 | CD68         | CD68 molecule                                                     |
| 99  | 5.34 | BNC2         | basonuclin 2                                                      |
| 100 | 5.31 | PKN3         | protein kinase N3                                                 |
| 101 | 5.20 | ADTRP        | androgen-dependent TFPI-regulating protein                        |
| 102 | 5.07 | PCDHB2       | protocadherin beta 2                                              |
| 103 | 5.07 | FLOT1        | flotillin 1                                                       |
| 104 | 5.02 | PLEKHO1      | pleckstrin homology domain containing, family O member 1          |
| 105 | 4.98 | TGFB1        | transforming growth factor, beta 1                                |
| 106 | 4.96 | ZNF439       | zinc finger protein 439                                           |
| 107 | 4.88 | UTS2         | urotensin 2                                                       |
| 108 | 4.86 | POLR1E       | polymerase (RNA) I polypeptide E, 53kDa                           |
| 109 | 4.85 | FLJ32255     | uncharacterized LOC643977                                         |
| 110 | 4.83 | HTATSF1P2    | HIV-1 Tat specific factor 1 pseudogene 2                          |
| 111 | 4.77 | INF2         | inverted formin, FH2 and WH2 domain containing                    |
| 112 | 4.71 | MAST4        | microtubule associated serine/threonine kinase family member 4    |
| 113 | 4.70 | NUDC         | nuclear distribution C homolog (A. nidulans)                      |
| 114 | 4.65 | ABL2         | v-abl Abelson murine leukemia viral oncogene homolog 2            |
| 115 | 4.65 | OPLAH        | 5-oxoprolinase (ATP-hydrolysing)                                  |
| 116 | 4.64 | FSD1L        | fibronectin type III and SPRY domain containing 1-like            |
| 117 | 4.63 | SFTA1P       | surfactant associated 1, pseudogene                               |
| 118 | 4.61 | ARL9         | ADP-ribosylation factor-like 9                                    |
| 119 | 4.61 | PGF          | placental growth factor                                           |
| 120 | 4.60 | ZNF672       | zinc finger protein 672                                           |
| 121 | 4.55 | DNLZ         | DNL-type zinc finger                                              |
| 122 | 4.54 | FMNL3        | formin-like 3                                                     |
| 123 | 4.52 | AFF3         | AF4/FMR2 family, member 3                                         |
| 124 | 4.46 | ZNF284       | Zinc finger protein 284                                           |

|     |      |                       |                                                                                                                           |
|-----|------|-----------------------|---------------------------------------------------------------------------------------------------------------------------|
| 125 | 4.45 | PCDHB7                | protocadherin beta 7                                                                                                      |
| 126 | 4.44 | MYO10                 | myosin X                                                                                                                  |
| 127 | 4.44 | PSMD2                 | proteasome (prosome, macropain) 26S subunit, non-ATPase, 2                                                                |
| 128 | 4.44 | SERPINB8              | serpin peptidase inhibitor, clade B (ovalbumin), member 8                                                                 |
| 129 | 4.38 | ANGPTL4               | angiopoietin-like 4                                                                                                       |
| 130 | 4.38 | PLAUR                 | plasminogen activator, urokinase receptor                                                                                 |
| 131 | 4.37 | ZNF404                | zinc finger protein 404                                                                                                   |
| 132 | 4.36 | RGNEF                 | 190 kDa guanine nucleotide exchange factor                                                                                |
| 133 | 4.36 | SEMA7A                | semaphorin 7A, GPI membrane anchor (John Milton Hagen blood group)                                                        |
| 134 | 4.33 | SPSB1                 | splA/ryanodine receptor domain and SOCS box containing 1                                                                  |
| 135 | 4.32 | C1orf52               | chromosome 1 open reading frame 52                                                                                        |
| 136 | 4.26 | FAM40B                | family with sequence similarity 40, member B                                                                              |
| 137 | 4.22 | RBM19                 | RNA binding motif protein 19                                                                                              |
| 138 | 4.20 | PMPCA                 | peptidase (mitochondrial processing) alpha                                                                                |
| 139 | 4.15 | MED22                 | mediator complex subunit 22                                                                                               |
| 140 | 4.12 | GPC6                  | glypican 6                                                                                                                |
| 141 | 4.11 | TEX10                 | testis expressed 10                                                                                                       |
| 142 | 4.07 | ARHGAP31              | Rho GTPase activating protein 31                                                                                          |
| 143 | 4.06 | CIZ1                  | CDKN1A interacting zinc finger protein 1                                                                                  |
| 144 | 4.00 | MYL6B                 | myosin, light chain 6B, alkali, smooth muscle and non-muscle                                                              |
| 145 | 3.99 | CD151                 | CD151 molecule (Raph blood group)                                                                                         |
| 146 | 3.99 | EXOSC4                | exosome component 4                                                                                                       |
| 147 | 3.90 | PDCD1LG2              | programmed cell death 1 ligand 2                                                                                          |
| 148 | 3.87 | VAC14                 | Vac14 homolog ( <i>S. cerevisiae</i> )                                                                                    |
| 149 | 3.86 | LOC646329             | uncharacterized LOC646329                                                                                                 |
| 150 | 3.81 | LINC00460             | Long intergenic non-protein coding RNA 460                                                                                |
| 151 | 3.80 | COMMD5                | COMM domain containing 5                                                                                                  |
| 152 | 3.80 | BEST3                 | bestrophin 3                                                                                                              |
| 153 | 3.76 | SMAP2                 | small ArfGAP2                                                                                                             |
| 154 | 3.76 | GNPDA1                | glucosamine-6-phosphate deaminase 1                                                                                       |
| 155 | 3.76 | AOX1                  | aldehyde oxidase 1                                                                                                        |
| 156 | 3.72 | BOLA3-AS1             | BOLA3 antisense RNA 1 (non-protein coding)                                                                                |
| 157 | 3.72 | YIF1B                 | Yip1 interacting factor homolog B ( <i>S. cerevisiae</i> )                                                                |
| 158 | 3.70 | LOC100287177          | uncharacterized LOC100287177                                                                                              |
| 159 | 3.70 | SLC27A4               | solute carrier family 27 (fatty acid transporter), member 4                                                               |
| 160 | 3.67 | TBC1D13               | TBC1 domain family, member 13                                                                                             |
| 161 | 3.64 | RECQL                 | RecQ protein-like (DNA helicase Q1-like)                                                                                  |
|     | 3.63 | DBNDD2///SYS1///SYS1- | dysbindin (dystrobrevin binding protein 1) domain containing 2///SYS1                                                     |
| 162 |      | DBNDD2                | Golgi-localized integral membrane protein homolog ( <i>S. cerevisiae</i> )///SYS1-DBNDD2 readthrough (non-protein coding) |
| 163 | 3.63 | RAPGEF1               | Rap guanine nucleotide exchange factor (GEF) 1                                                                            |
| 164 | 3.61 | SLC9B2                | solute carrier family 9, subfamily B (NHA2, cation proton antiporter 2), member 2                                         |
| 165 | 3.59 | OPCML                 | opioid binding protein/cell adhesion molecule-like                                                                        |
| 166 | 3.55 | C1orf51               | chromosome 1 open reading frame 51                                                                                        |
| 167 | 3.53 | BAK1                  | BCL2-antagonist/killer 1                                                                                                  |

|     |      |           |                                                                                   |
|-----|------|-----------|-----------------------------------------------------------------------------------|
| 168 | 3.52 | EFTUD1    | elongation factor Tu GTP binding domain containing 1                              |
| 169 | 3.51 | CCDC85B   | coiled-coil domain containing 85B                                                 |
| 170 | 3.50 | RIPK2     | receptor-interacting serine-threonine kinase 2                                    |
| 171 | 3.48 | TPP1      | tripeptidyl peptidase I                                                           |
| 172 | 3.48 | ANKS6     | ankyrin repeat and sterile alpha motif domain containing 6                        |
| 173 | 3.47 | CDC42SE1  | CDC42 small effector 1                                                            |
| 174 | 3.44 | C20orf27  | chromosome 20 open reading frame 27                                               |
| 175 | 3.43 | TOP1MT    | topoisomerase (DNA) I, mitochondrial                                              |
| 176 | 3.42 | SPATA2    | spermatogenesis associated 2                                                      |
| 177 | 3.41 | TRAPPC10  | trafficking protein particle complex 10                                           |
| 178 | 3.40 | COQ4      | coenzyme Q4 homolog ( <i>S. cerevisiae</i> )                                      |
| 179 | 3.39 | CDK17     | cyclin-dependent kinase 17                                                        |
| 180 | 3.38 | FAM176B   | family with sequence similarity 176, member B                                     |
| 181 | 3.38 | WDFY2     | WD repeat and FYVE domain containing 2                                            |
| 182 | 3.37 | FRMD4A    | FERM domain containing 4A                                                         |
| 183 | 3.37 | OGFR      | opioid growth factor receptor                                                     |
| 184 | 3.32 | ASB6      | ankyrin repeat and SOCS box containing 6                                          |
| 185 | 3.32 | RBFOX2    | RNA binding protein, fox-1 homolog ( <i>C. elegans</i> ) 2                        |
| 186 | 3.30 | CAMK2N2   | calcium/calmodulin-dependent protein kinase II inhibitor 2                        |
| 187 | 3.29 | TOMM34    | translocase of outer mitochondrial membrane 34                                    |
| 188 | 3.28 | SLC9A1    | solute carrier family 9, subfamily A (NHE1, cation proton antiporter 1), member 1 |
| 189 | 3.27 | HGS       | hepatocyte growth factor-regulated tyrosine kinase substrate                      |
| 190 | 3.27 | NAB2      | NGFI-A binding protein 2 (EGR1 binding protein 2)                                 |
| 191 | 3.24 | NTMT1     | N-terminal Xaa-Pro-Lys N-methyltransferase 1                                      |
| 192 | 3.24 | TP53RK    | TP53 regulating kinase                                                            |
| 193 | 3.22 | GSTO1     | glutathione S-transferase omega 1                                                 |
| 194 | 3.21 | PQLC2     | PQ loop repeat containing 2                                                       |
| 195 | 3.20 | ARF3      | ADP-ribosylation factor 3                                                         |
| 196 | 3.19 | HMGA2     | high mobility group AT-hook 2                                                     |
| 197 | 3.18 | DUSP3     | dual specificity phosphatase 3                                                    |
| 198 | 3.18 | COBRA1    | cofactor of BRCA1                                                                 |
| 199 | 3.16 | LOC401588 | uncharacterized LOC401588                                                         |
| 200 | 3.16 | UCK1      | uridine-cytidine kinase 1                                                         |
| 201 | 3.15 | FPGS      | folylpolyglutamate synthase                                                       |
| 202 | 3.15 | B3GAT1    | beta-1,3-glucuronyltransferase 1 (glucuronosyltransferase P)                      |
| 203 | 3.14 | FGFR1     | fibroblast growth factor receptor 1                                               |
| 204 | 3.13 | DLGAP4    | discs, large ( <i>Drosophila</i> ) homolog-associated protein 4                   |
| 205 | 3.13 | BCL10     | B-cell CLL/lymphoma 10                                                            |
| 206 | 3.13 | CENPT     | centromere protein T                                                              |
| 207 | 3.12 | PUF60     | poly-U binding splicing factor 60KDa                                              |
| 208 | 3.11 | CPQ       | carboxypeptidase Q                                                                |
| 209 | 3.09 | GNB2      | guanine nucleotide binding protein (G protein), beta polypeptide 2                |
| 210 | 3.09 | VEGFB     | vascular endothelial growth factor B                                              |
| 211 | 3.07 | PPM1J     | protein phosphatase, Mg <sup>2+</sup> /Mn <sup>2+</sup> dependent, 1J             |

|     |      |                     |                                                                                                    |
|-----|------|---------------------|----------------------------------------------------------------------------------------------------|
| 212 | 3.06 | ABCF2               | ATP-binding cassette, sub-family F (GCN20), member 2                                               |
| 213 | 3.06 | MFSD10              | major facilitator superfamily domain containing 10                                                 |
| 214 | 3.05 | LBX2-AS1            | LBX2 antisense RNA 1 (non-protein coding)                                                          |
| 215 | 3.05 | VPS53               | vacuolar protein sorting 53 homolog ( <i>S. cerevisiae</i> )                                       |
| 216 | 3.05 | STK4                | serine/threonine kinase 4                                                                          |
| 217 | 3.05 | HOMER3              | homer homolog 3 ( <i>Drosophila</i> )                                                              |
| 218 | 3.04 | PNP                 | purine nucleoside phosphorylase                                                                    |
| 219 | 3.04 | RAD51L3-RFFL///RFFL | RAD51L3-RFFL readthrough///ring finger and FYVE-like domain containing E3 ubiquitin protein ligase |
| 220 | 3.00 | TTL11               | tubulin tyrosine ligase-like family, member 11                                                     |
| 221 | 2.99 | TOR1A               | torsin family 1, member A (torsin A)                                                               |
| 222 | 2.99 | MICAL1              | microtubule associated monooxygenase, calponin and LIM domain containing 1                         |
| 223 | 2.99 | ATAD3A///ATAD3B     | ATPase family, AAA domain containing 3A///ATPase family, AAA domain containing 3B                  |
| 224 | 2.99 | M6PR                | mannose-6-phosphate receptor (cation dependent)                                                    |
| 225 | 2.98 | ZC3H3               | zinc finger CCCH-type containing 3                                                                 |
| 226 | 2.97 | STX1A               | syntaxin 1A (brain)                                                                                |
| 227 | 2.97 | CD320               | CD320 molecule                                                                                     |
| 228 | 2.96 | NSMAF               | neutral sphingomyelinase (N-SMase) activation associated factor                                    |
| 229 | 2.96 | MAZ                 | MYC-associated zinc finger protein (purine-binding transcription factor)                           |
| 230 | 2.95 | MED27               | mediator complex subunit 27                                                                        |
| 231 | 2.95 | ANTXR2              | anthrax toxin receptor 2                                                                           |
| 232 | 2.92 | DGKG                | diacylglycerol kinase, gamma 90kDa                                                                 |
| 233 | 2.88 | PPA2                | pyrophosphatase (inorganic) 2                                                                      |
| 234 | 2.88 | CTTNBP2NL           | CTTNBP2 N-terminal like                                                                            |
| 235 | 2.87 | CXorf40A///CXorf40B | chromosome X open reading frame 40A///chromosome X open reading frame 40B                          |
| 236 | 2.87 | C8orf31             | chromosome 8 open reading frame 31                                                                 |
| 237 | 2.85 | SF3B3               | splicing factor 3b, subunit 3, 130kDa                                                              |
| 238 | 2.85 | DCTN5               | dynactin 5 (p25)                                                                                   |
| 239 | 2.84 | NUP188              | nucleoporin 188kDa                                                                                 |
| 240 | 2.83 | ANAPC2              | anaphase promoting complex subunit 2                                                               |
| 241 | 2.82 | MUC12               | mucin 12, cell surface associated                                                                  |
| 242 | 2.82 | RNF208              | ring finger protein 208                                                                            |
| 243 | 2.82 | HERC2P3             | hect domain and RLD 2 pseudogene 3                                                                 |
| 244 | 2.81 | LRWD1///MIR4467     | leucine-rich repeats and WD repeat domain containing 1///microRNA 4467                             |
| 245 | 2.80 | LCAT                | lecithin-cholesterol acyltransferase                                                               |
| 246 | 2.80 | MYO5A               | myosin VA (heavy chain 12, myosin)                                                                 |
| 247 | 2.80 | PEX5                | peroxisomal biogenesis factor 5                                                                    |
| 248 | 2.79 | CDC37               | cell division cycle 37 homolog ( <i>S. cerevisiae</i> )                                            |
| 249 | 2.78 | COPS7A              | COP9 constitutive photomorphogenic homolog subunit 7A ( <i>Arabidopsis</i> )                       |
| 250 | 2.78 | NXPE3               | neurexophilin and PC-esterase domain family, member 3                                              |
| 251 | 2.77 | SSSCA1              | Sjogren syndrome/scleroderma autoantigen 1                                                         |

|     |      |           |                                                                                   |
|-----|------|-----------|-----------------------------------------------------------------------------------|
| 252 | 2.76 | PIGT      | phosphatidylinositol glycan anchor biosynthesis, class T                          |
| 253 | 2.75 | C17orf81  | chromosome 17 open reading frame 81                                               |
| 254 | 2.75 | HSD17B14  | hydroxysteroid (17-beta) dehydrogenase 14                                         |
| 255 | 2.75 | CCND3     | cyclin D3                                                                         |
| 256 | 2.75 | PCOLCE    | procollagen C-endopeptidase enhancer                                              |
| 257 | 2.73 | SSNA1     | Sjogren syndrome nuclear autoantigen 1                                            |
| 258 | 2.72 | COPS6     | COP9 constitutive photomorphogenic homolog subunit 6 (Arabidopsis)                |
| 259 | 2.72 | SAT2      | spermidine/spermine N1-acetyltransferase family member 2                          |
| 260 | 2.71 | ZNF167    | zinc finger protein 167                                                           |
| 261 | 2.70 | USP20     | ubiquitin specific peptidase 20                                                   |
| 262 | 2.70 | NLRP11    | NLR family, pyrin domain containing 11                                            |
| 263 | 2.69 | TEAD2     | TEA domain family member 2                                                        |
| 264 | 2.68 | VPS4A     | vacuolar protein sorting 4 homolog A ( <i>S. cerevisiae</i> )                     |
| 265 | 2.67 | MOCS3     | molybdenum cofactor synthesis 3                                                   |
| 266 | 2.67 | SURF4     | surfeit 4                                                                         |
| 267 | 2.66 | C19orf43  | chromosome 19 open reading frame 43                                               |
| 268 | 2.65 | IKBKB     | inhibitor of kappa light polypeptide gene enhancer in B-cells, kinase beta        |
| 269 | 2.65 | RNF24     | ring finger protein 24                                                            |
| 270 | 2.63 | LONRF3    | LON peptidase N-terminal domain and ring finger 3                                 |
| 271 | 2.63 | MEPCE     | methylphosphate capping enzyme                                                    |
| 272 | 2.62 | FASTKD5   | FAST kinase domains 5                                                             |
| 273 | 2.62 | NIPA1     | non imprinted in Prader-Willi/Angelman syndrome 1                                 |
| 274 | 2.61 | RIC8A     | resistance to inhibitors of cholinesterase 8 homolog A ( <i>C. elegans</i> )      |
| 275 | 2.61 | HSF1      | heat shock transcription factor 1                                                 |
| 276 | 2.61 | PDE4D     | phosphodiesterase 4D, cAMP-specific                                               |
| 277 | 2.61 | SLC9A7    | solute carrier family 9, subfamily A (NHE7, cation proton antiporter 7), member 7 |
| 278 | 2.60 | DDX31     | DEAD (Asp-Glu-Ala-Asp) box polypeptide 31                                         |
| 279 | 2.60 | FBXW2     | F-box and WD repeat domain containing 2                                           |
| 280 | 2.59 | CTU2      | cytosolic thiouridylase subunit 2 homolog ( <i>S. pombe</i> )                     |
| 281 | 2.59 | VEGFC     | vascular endothelial growth factor C                                              |
| 282 | 2.59 | C9orf78   | chromosome 9 open reading frame 78                                                |
| 283 | 2.58 | RAB3IP    | RAB3A interacting protein (rabin3)                                                |
| 284 | 2.56 | LOC728485 | uncharacterized LOC728485                                                         |
| 285 | 2.56 | POLR1A    | polymerase (RNA) I polypeptide A, 194kDa                                          |
| 286 | 2.53 | C20orf112 | chromosome 20 open reading frame 112                                              |
| 287 | 2.53 | KCNH2     | potassium voltage-gated channel, subfamily H (eag-related), member 2              |
| 288 | 2.53 | TMEM203   | transmembrane protein 203                                                         |
| 289 | 2.53 | BAZ2A     | bromodomain adjacent to zinc finger domain, 2A                                    |
| 290 | 2.53 | TRAF2     | TNF receptor-associated factor 2                                                  |
| 291 | 2.52 | GTF3C5    | general transcription factor IIIC, polypeptide 5, 63kDa                           |
| 292 | 2.52 | ASB1      | ankyrin repeat and SOCS box containing 1                                          |
| 293 | 2.51 | FAM65A    | family with sequence similarity 65, member A                                      |
| 294 | 2.51 | SNRNP     | small nuclear ribonucleoprotein polypeptides B and B1                             |
| 295 | 2.51 | SLC17A9   | solute carrier family 17, member 9                                                |

|     |      |          |                                                                                       |
|-----|------|----------|---------------------------------------------------------------------------------------|
| 296 | 2.51 | SMURF1   | SMAD specific E3 ubiquitin protein ligase 1                                           |
| 297 | 2.50 | MRAP2    | melanocortin 2 receptor accessory protein 2                                           |
| 298 | 2.50 | PSMB7    | proteasome (prosome, macropain) subunit, beta type, 7                                 |
| 299 | 2.49 | EVC      | Ellis van Creveld syndrome                                                            |
| 300 | 2.49 | CERS5    | ceramide synthase 5                                                                   |
| 301 | 2.49 | ZNF252P  | zinc finger protein 252, pseudogene                                                   |
| 302 | 2.49 | SLC39A13 | solute carrier family 39 (zinc transporter), member 13                                |
| 303 | 2.48 | CCDC136  | coiled-coil domain containing 136                                                     |
| 304 | 2.48 | MYO9B    | myosin IXB                                                                            |
| 305 | 2.48 | RUSC2    | RUN and SH3 domain containing 2                                                       |
| 306 | 2.48 | PBX2     | pre-B-cell leukemia homeobox 2                                                        |
| 307 | 2.47 | ETV4     | ets variant 4                                                                         |
| 308 | 2.47 | ZNF583   | zinc finger protein 583                                                               |
| 309 | 2.47 | EXOG     | endo/exonuclease (5'-3'), endonuclease G-like                                         |
| 310 | 2.46 | MAPKAPK3 | mitogen-activated protein kinase-activated protein kinase 3                           |
| 311 | 2.46 | PI4K2A   | phosphatidylinositol 4-kinase type 2 alpha                                            |
| 312 | 2.45 | RALGDS   | ral guanine nucleotide dissociation stimulator                                        |
| 313 | 2.44 | ADRM1    | adhesion regulating molecule 1                                                        |
| 314 | 2.43 | GIT2     | G protein-coupled receptor kinase interacting ArfGAP 2                                |
| 315 | 2.43 | ZMAT5    | zinc finger, matrin-type 5                                                            |
| 316 | 2.43 | HM13     | histocompatibility (minor) 13                                                         |
| 317 | 2.43 | TRPC4AP  | transient receptor potential cation channel, subfamily C, member 4 associated protein |
| 318 | 2.40 | PCDHB8   | protocadherin beta 8                                                                  |
| 319 | 2.40 | SMG9     | smg-9 homolog, nonsense mediated mRNA decay factor (C. elegans)                       |
| 320 | 2.40 | TLR6     | toll-like receptor 6                                                                  |
| 321 | 2.40 | TOLLIP   | toll interacting protein                                                              |
| 322 | 2.39 | TMEM145  | transmembrane protein 145                                                             |
| 323 | 2.38 | ELK1     | ELK1, member of ETS oncogene family                                                   |
| 324 | 2.38 | ZNF71    | zinc finger protein 71                                                                |
| 325 | 2.38 | CEP250   | centrosomal protein 250kDa                                                            |
| 326 | 2.36 | FOXK2    | forkhead box K2                                                                       |
| 327 | 2.36 | ZNF597   | zinc finger protein 597                                                               |
| 328 | 2.36 | MAP1LC3B | microtubule-associated protein 1 light chain 3 beta                                   |
| 329 | 2.35 | TLE3     | transducin-like enhancer of split 3 (E(sp1) homolog, Drosophila)                      |
| 330 | 2.35 | ATXN7L2  | ataxin 7-like 2                                                                       |
| 331 | 2.34 | FLJ26850 | FLJ26850 protein                                                                      |
| 332 | 2.34 | SLC15A3  | solute carrier family 15, member 3                                                    |
| 333 | 2.34 | TMEM138  | transmembrane protein 138                                                             |
| 334 | 2.34 | SRRT     | serrate RNA effector molecule homolog (Arabidopsis)                                   |
| 335 | 2.32 | TMEM246  | transmembrane protein 246                                                             |
| 336 | 2.31 | BCL7C    | B-cell CLL/lymphoma 7C                                                                |
| 337 | 2.28 | APH1B    | anterior pharynx defective 1 homolog B (C. elegans)                                   |
| 338 | 2.28 | ARPC5L   | actin related protein 2/3 complex, subunit 5-like                                     |
| 339 | 2.28 | HES7     | hairy and enhancer of split 7 (Drosophila)                                            |



|     |      |                 |                                                                                 |
|-----|------|-----------------|---------------------------------------------------------------------------------|
| 340 | 2.27 | TOR1B           | torsin family 1, member B (torsin B)                                            |
| 341 | 2.27 | UFC1            | ubiquitin-fold modifier conjugating enzyme 1                                    |
| 342 | 2.26 | LEPRE1          | leucine proline-enriched proteoglycan (leprecan) 1                              |
| 343 | 2.25 | DUS2L           | dihydrouridine synthase 2-like, SMM1 homolog ( <i>S. cerevisiae</i> )           |
| 344 | 2.25 | SNORA5B///TBRG4 | small nucleolar RNA, H/ACA box 5B///transforming growth factor beta regulator 4 |
| 345 | 2.25 | EIF5A           | eukaryotic translation initiation factor 5A                                     |
| 346 | 2.23 | C14orf135       | chromosome 14 open reading frame 135                                            |
| 347 | 2.22 | TFR2            | transferrin receptor 2                                                          |
| 348 | 2.22 | ARMC9           | armadillo repeat containing 9                                                   |
| 349 | 2.21 | WDR85           | WD repeat domain 85                                                             |
| 350 | 2.21 | RNF220          | ring finger protein 220                                                         |
| 351 | 2.20 | DDAH1           | dimethylarginine dimethylaminohydrolase 1                                       |
| 352 | 2.20 | DAXX            | death-domain associated protein                                                 |
| 353 | 2.20 | PCDHB16         | protocadherin beta 16                                                           |
| 354 | 2.20 | SEC61A2         | Sec61 alpha 2 subunit ( <i>S. cerevisiae</i> )                                  |
| 355 | 2.19 | SH2B2           | SH2B adaptor protein 2                                                          |
| 356 | 2.19 | IRF5            | interferon regulatory factor 5                                                  |
| 357 | 2.18 | MRPL41          | mitochondrial ribosomal protein L41                                             |
| 358 | 2.17 | LOC282997       | uncharacterized LOC282997                                                       |
| 359 | 2.17 | TBC1D10A        | TBC1 domain family, member 10A                                                  |
| 360 | 2.17 | SMYD5           | SMYD family member 5                                                            |
| 361 | 2.17 | SURF2           | surfeit 2                                                                       |
| 362 | 2.16 | ZFYVE1          | zinc finger, FYVE domain containing 1                                           |
| 363 | 2.15 | ARFGAP1         | ADP-ribosylation factor GTPase activating protein 1                             |
| 364 | 2.15 | ZNF668          | zinc finger protein 668                                                         |
| 365 | 2.15 | FXR2            | fragile X mental retardation, autosomal homolog 2                               |
| 366 | 2.14 | DCTN2           | dynactin 2 (p50)                                                                |
| 367 | 2.14 | ST3GAL1         | ST3 beta-galactoside alpha-2,3-sialyltransferase 1                              |
| 368 | 2.13 | DOK1            | docking protein 1, 62kDa (downstream of tyrosine kinase 1)                      |
| 369 | 2.13 | ZER1            | zer-1 homolog ( <i>C. elegans</i> )                                             |
| 370 | 2.13 | DEDD            | death effector domain containing                                                |
| 371 | 2.13 | SLC35C2         | solute carrier family 35, member C2                                             |
| 372 | 2.13 | DRG2            | developmentally regulated GTP binding protein 2                                 |
| 373 | 2.13 | CREM            | cAMP responsive element modulator                                               |
| 374 | 2.11 | LTK             | leukocyte receptor tyrosine kinase                                              |
| 375 | 2.10 | SH3GL1          | SH3-domain GRB2-like 1                                                          |
| 376 | 2.09 | SLC4A8          | solute carrier family 4, sodium bicarbonate cotransporter, member 8             |
| 377 | 2.08 | POLR2E          | polymerase (RNA) II (DNA directed) polypeptide E, 25kDa                         |
| 378 | 2.08 | FAM195B         | family with sequence similarity 195, member B                                   |
| 379 | 2.07 | PCDHB12         | protocadherin beta 12                                                           |
| 380 | 2.07 | MRPL15          | mitochondrial ribosomal protein L15                                             |
| 381 | 2.06 | FHL3            | four and a half LIM domains 3                                                   |
| 382 | 2.06 | BAP1            | BRCA1 associated protein-1 (ubiquitin carboxy-terminal hydrolase)               |
| 383 | 2.06 | PI4KB           | phosphatidylinositol 4-kinase, catalytic, beta                                  |

|     |      |           |                                                                                 |
|-----|------|-----------|---------------------------------------------------------------------------------|
| 384 | 2.05 | LOC344595 | uncharacterized LOC344595                                                       |
| 385 | 2.05 | SHANK1    | SH3 and multiple ankyrin repeat domains 1                                       |
| 386 | 2.05 | SSH2      | slingshot homolog 2 (Drosophila)                                                |
| 387 | 2.05 | UBTF      | upstream binding transcription factor, RNA polymerase I                         |
| 388 | 2.04 | MED12     | mediator complex subunit 12                                                     |
| 389 | 2.04 | PSMD8     | proteasome (prosome, macropain) 26S subunit, non-ATPase, 8                      |
| 390 | 2.04 | SNX21     | sorting nexin family member 21                                                  |
| 391 | 2.03 | TAF6      | TAF6 RNA polymerase II, TATA box binding protein (TBP)-associated factor, 80kDa |
| 392 | 2.02 | CPSF3L    | cleavage and polyadenylation specific factor 3-like                             |
| 393 | 2.02 | ABCD1     | ATP-binding cassette, sub-family D (ALD), member 1                              |
| 394 | 2.02 | DHX38     | DEAH (Asp-Glu-Ala-His) box polypeptide 38                                       |
| 395 | 2.02 | FIBP      | fibroblast growth factor (acidic) intracellular binding protein                 |
| 396 | 2.01 | KLHL29    | kelch-like 29 (Drosophila)                                                      |
| 397 | 2.00 | NCBP1     | nuclear cap binding protein subunit 1, 80kDa                                    |
| 398 | 2.00 | SEC22C    | SEC22 vesicle trafficking protein homolog C (S. cerevisiae)                     |
| 399 | 2.00 | FGD3      | FYVE, RhoGEF and PH domain containing 3                                         |

### Genes downregulated in RKO vs all other cell lines and normal colon samples

|    |        |              |                                                                                                |
|----|--------|--------------|------------------------------------------------------------------------------------------------|
| 1  | 331.08 | ANXA3        | annexin A3                                                                                     |
| 2  | 260.31 | KRT19        | keratin 19                                                                                     |
| 3  | 255.30 | CDH1         | cadherin 1, type 1, E-cadherin (epithelial)                                                    |
| 4  | 251.15 | MAL2         | mal, T-cell differentiation protein 2 (gene/pseudogene)                                        |
| 5  | 225.92 | EREG         | epiregulin                                                                                     |
| 6  | 217.99 | AREG///AREGB | amphiregulin///amphiregulin B                                                                  |
| 7  | 121.49 | FOXQ1        | forkhead box Q1                                                                                |
| 8  | 98.90  | KLF5         | Kruppel-like factor 5 (intestinal)                                                             |
| 9  | 95.66  | ME1          | malic enzyme 1, NADP(+)-dependent, cytosolic                                                   |
| 10 | 89.49  | ESRP1        | epithelial splicing regulatory protein 1                                                       |
| 11 | 89.39  | PLK2         | polo-like kinase 2                                                                             |
| 12 | 87.90  | GALNT3       | UDP-N-acetyl-alpha-D-galactosamine:polypeptide N-acetylgalactosaminyltransferase 3 (GalNAc-T3) |
| 13 | 86.48  | CXADR        | coxsackie virus and adenovirus receptor                                                        |
| 14 | 75.01  | ID2          | inhibitor of DNA binding 2, dominant negative helix-loop-helix protein                         |
| 15 | 70.91  | ATP8B1       | ATPase, aminophospholipid transporter, class I, type 8B, member 1                              |
| 16 | 70.40  | GJB2         | gap junction protein, beta 2, 26kDa                                                            |
| 17 | 69.12  | PDLIM1       | PDZ and LIM domain 1                                                                           |
| 18 | 66.28  | TSPAN13      | tetraspanin 13                                                                                 |
| 19 | 60.65  | SOX9         | SRY (sex determining region Y)-box 9                                                           |
| 20 | 60.44  | RBM47        | RNA binding motif protein 47                                                                   |
| 21 | 56.54  | KITLG        | KIT ligand                                                                                     |
| 22 | 54.76  | RAB25        | RAB25, member RAS oncogene family                                                              |
| 23 | 50.73  | SCOC         | short coiled-coil protein                                                                      |
| 24 | 50.00  | IL18         | interleukin 18 (interferon-gamma-inducing factor)                                              |
| 25 | 48.74  | SNX18        | sorting nexin 18                                                                               |

|    |       |                            |                                                                           |
|----|-------|----------------------------|---------------------------------------------------------------------------|
| 26 | 47.12 | S100A14                    | S100 calcium binding protein A14                                          |
| 27 | 44.88 | ARL4C                      | ADP-ribosylation factor-like 4C                                           |
| 28 | 44.07 | F2RL1                      | coagulation factor II (thrombin) receptor-like 1                          |
| 29 | 39.54 | SCRN1                      | secernin 1                                                                |
| 30 | 38.97 | TNS3                       | tensin 3                                                                  |
| 31 | 34.37 | FAM135A                    | family with sequence similarity 135, member A                             |
| 32 | 33.27 | CDS1                       | CDP-diacylglycerol synthase (phosphatidate cytidyltransferase) 1          |
| 33 | 32.53 | AIM1                       | absent in melanoma 1                                                      |
| 34 | 31.93 | TRIM59                     | tripartite motif containing 59                                            |
| 35 | 30.38 | TJP2                       | tight junction protein 2 (zona occludens 2)                               |
| 36 | 29.32 | ID1                        | inhibitor of DNA binding 1, dominant negative helix-loop-helix protein    |
| 37 | 29.26 | KLK10                      | kallikrein-related peptidase 10                                           |
| 38 | 28.80 | HES1                       | hairy and enhancer of split 1, (Drosophila)                               |
| 39 | 28.38 | SORL1                      | sortilin-related receptor, L(DLR class) A repeats containing              |
| 40 | 28.37 | SHROOM3                    | shroom family member 3                                                    |
| 41 | 28.29 | GPRC5A                     | G protein-coupled receptor, family C, group 5, member A                   |
| 42 | 26.07 | KRT8                       | keratin 8                                                                 |
| 43 | 25.36 | AHR                        | aryl hydrocarbon receptor                                                 |
| 44 | 24.62 | DSC2                       | desmocollin 2                                                             |
| 45 | 24.06 | MYOF                       | myoferlin                                                                 |
| 46 | 23.35 | NUP62CL                    | nucleoporin 62kDa C-terminal like                                         |
| 47 | 23.34 | ZBTB10                     | zinc finger and BTB domain containing 10                                  |
| 48 | 22.08 | LGALS3BP                   | lectin, galactoside-binding, soluble, 3 binding protein                   |
| 49 | 21.37 | NEBL                       | nebulette                                                                 |
| 50 | 20.76 | MYO5B                      | myosin VB                                                                 |
| 51 | 19.61 | CLDN7                      | claudin 7                                                                 |
| 52 | 19.59 | EPCAM                      | epithelial cell adhesion molecule                                         |
| 53 | 19.42 | ITGA6                      | integrin, alpha 6                                                         |
| 54 | 18.52 | MYO1D                      | myosin ID                                                                 |
| 55 | 18.39 | LOC100499467               | uncharacterized LOC100499467                                              |
| 56 | 17.89 | ATXN1                      | ataxin 1                                                                  |
| 57 | 17.65 | MPZL2                      | myelin protein zero-like 2                                                |
| 58 | 17.62 | ADD3                       | adducin 3 (gamma)                                                         |
| 59 | 17.48 | SPINT2                     | serine peptidase inhibitor, Kunitz type, 2                                |
| 60 | 17.25 | GRHL2                      | grainyhead-like 2 (Drosophila)                                            |
| 61 | 16.14 | PIR                        | pirin (iron-binding nuclear protein)                                      |
| 62 | 16.07 | ARHGAP8///PRR5-<br>ARHGAP8 | Rho GTPase activating protein 8///PRR5-ARHGAP8 readthrough                |
| 63 | 15.48 | INADL                      | InaD-like (Drosophila)                                                    |
| 64 | 14.35 | EHF                        | ets homologous factor                                                     |
| 65 | 14.07 | ABCC3                      | ATP-binding cassette, sub-family C (CFTR/MRP), member 3                   |
| 66 | 14.07 | ELF3                       | E74-like factor 3 (ets domain transcription factor, epithelial-specific ) |
| 67 | 13.97 | JUP                        | junction plakoglobin                                                      |
| 68 | 13.86 | HMMR                       | hyaluronan-mediated motility receptor (RHAMM)                             |
| 69 | 12.92 | SERINC5                    | serine incorporator 5                                                     |

|     |       |          |                                                                                                      |
|-----|-------|----------|------------------------------------------------------------------------------------------------------|
| 70  | 12.84 | ENPP5    | ectonucleotide pyrophosphatase/phosphodiesterase 5 (putative)                                        |
| 71  | 12.66 | EPB41L5  | erythrocyte membrane protein band 4.1 like 5                                                         |
| 72  | 12.43 | BTC      | betacellulin                                                                                         |
| 73  | 12.31 | CDH3     | cadherin 3, type 1, P-cadherin (placental)                                                           |
| 74  | 12.21 | C1orf106 | chromosome 1 open reading frame 106                                                                  |
| 75  | 11.97 | DSP      | desmoplakin                                                                                          |
| 76  | 10.90 | RNF43    | ring finger protein 43                                                                               |
| 77  | 10.81 | IFIH1    | interferon induced with helicase C domain 1                                                          |
| 78  | 10.47 | NR1D2    | nuclear receptor subfamily 1, group D, member 2                                                      |
| 79  | 10.21 | MTUS1    | microtubule associated tumor suppressor 1                                                            |
| 80  | 10.04 | PPL      | periplakin                                                                                           |
| 81  | 9.99  | FAT1     | FAT tumor suppressor homolog 1 (Drosophila)                                                          |
| 82  | 9.73  | ENDOD1   | endonuclease domain containing 1                                                                     |
| 83  | 9.71  | LAMC2    | laminin, gamma 2                                                                                     |
| 84  | 9.60  | CASK     | calcium/calmodulin-dependent serine protein kinase (MAGUK family)                                    |
| 85  | 9.42  | AP1M2    | adaptor-related protein complex 1, mu 2 subunit                                                      |
| 86  | 9.38  | KRTCAP3  | keratinocyte associated protein 3                                                                    |
| 87  | 9.11  | IRF6     | interferon regulatory factor 6                                                                       |
| 88  | 9.09  | GPR39    | G protein-coupled receptor 39                                                                        |
| 89  | 8.81  | C4orf34  | chromosome 4 open reading frame 34                                                                   |
| 90  | 8.63  | SEC63    | SEC63 homolog (S. cerevisiae)                                                                        |
| 91  | 8.28  | SERPINB1 | serpin peptidase inhibitor, clade B (ovalbumin), member 1                                            |
| 92  | 8.17  | NFE2L3   | nuclear factor (erythroid-derived 2)-like 3                                                          |
| 93  | 8.08  | SH2D3A   | SH2 domain containing 3A                                                                             |
| 94  | 7.94  | ATP2B1   | ATPase, Ca <sup>++</sup> transporting, plasma membrane 1                                             |
| 95  | 7.72  | DENND2D  | DENN/MADD domain containing 2D                                                                       |
| 96  | 7.66  | MYO6     | myosin VI                                                                                            |
| 97  | 7.64  | MACC1    | metastasis associated in colon cancer 1                                                              |
| 98  | 7.35  | FAM59A   | family with sequence similarity 59, member A                                                         |
| 99  | 7.29  | STXBP6   | syntaxin binding protein 6 (amisyn)                                                                  |
| 100 | 7.20  | SGK223   | homolog of rat pragma of Rnd2                                                                        |
| 101 | 7.16  | NXN      | nucleoredoxin                                                                                        |
| 102 | 6.93  | HIBCH    | 3-hydroxyisobutyryl-CoA hydrolase                                                                    |
| 103 | 6.92  | DCP1A    | DCP1 decapping enzyme homolog A (S. cerevisiae)                                                      |
| 104 | 6.91  | GCA      | grancalcin, EF-hand calcium binding protein                                                          |
| 105 | 6.85  | SH3YL1   | SH3 domain containing, Ysc84-like 1 (S. cerevisiae)                                                  |
| 106 | 6.60  | UACA     | uveal autoantigen with coiled-coil domains and ankyrin repeats                                       |
| 107 | 6.56  | SNTB1    | syntrophin, beta 1 (dystrophin-associated protein A1, 59kDa, basic component 1)                      |
| 108 | 6.48  | SRD5A1   | steroid-5-alpha-reductase, alpha polypeptide 1 (3-oxo-5 alpha-steroid delta 4-dehydrogenase alpha 1) |
| 109 | 6.48  | TBC1D8   | TBC1 domain family, member 8 (with GRAM domain)                                                      |
| 110 | 6.21  | CLOCK    | clock homolog (mouse)                                                                                |
| 111 | 6.18  | TPD52L1  | tumor protein D52-like 1                                                                             |
| 112 | 6.17  | PLEKHA7  | pleckstrin homology domain containing, family A member 7                                             |

|     |      |                           |                                                                  |
|-----|------|---------------------------|------------------------------------------------------------------|
| 113 | 6.00 | PPP3CA                    | protein phosphatase 3, catalytic subunit, alpha isozyme          |
| 114 | 5.97 | TMC4                      | transmembrane channel-like 4                                     |
| 115 | 5.93 | ST14                      | suppression of tumorigenicity 14 (colon carcinoma)               |
| 116 | 5.92 | BSPRY                     | B-box and SPRY domain containing                                 |
| 117 | 5.82 | MFSD6                     | major facilitator superfamily domain containing 6                |
| 118 | 5.79 | USP53                     | ubiquitin specific peptidase 53                                  |
| 119 | 5.77 | MPZL3                     | myelin protein zero-like 3                                       |
| 120 | 5.70 | SLC44A5                   | solute carrier family 44, member 5                               |
| 121 | 5.69 | OSBPL10                   | oxysterol binding protein-like 10                                |
| 122 | 5.56 | C19orf33                  | chromosome 19 open reading frame 33                              |
| 123 | 5.51 | BOLA1                     | bolA homolog 1 (E. coli)                                         |
| 124 | 5.45 | KRT18                     | keratin 18                                                       |
| 125 | 5.45 | TLR3                      | toll-like receptor 3                                             |
| 126 | 5.35 | JPH1                      | junctionophilin 1                                                |
| 127 | 5.23 | THAP9-AS1                 | THAP9 antisense RNA 1 (non-protein coding)                       |
| 128 | 5.10 | KLF11                     | Kruppel-like factor 11                                           |
| 129 | 5.09 | ELL3                      | elongation factor RNA polymerase II-like 3                       |
| 130 | 5.08 | THAP10                    | THAP domain containing 10                                        |
| 131 | 5.03 | TNFAIP8                   | tumor necrosis factor, alpha-induced protein 8                   |
| 132 | 4.96 | LRP11                     | low density lipoprotein receptor-related protein 11              |
| 133 | 4.82 | SFN                       | stratifin                                                        |
| 134 | 4.82 | RIPK4                     | receptor-interacting serine-threonine kinase 4                   |
| 135 | 4.80 | MAP7                      | microtubule-associated protein 7                                 |
| 136 | 4.79 | RHPN2                     | rhopilin, Rho GTPase binding protein 2                           |
| 137 | 4.73 | MARVELD2                  | MARVEL domain containing 2                                       |
| 138 | 4.63 | OSBPL3                    | oxysterol binding protein-like 3                                 |
| 139 | 4.58 | FA2H                      | fatty acid 2-hydroxylase                                         |
| 140 | 4.58 | CADPS2                    | Ca <sup>++</sup> -dependent secretion activator 2                |
| 141 | 4.56 | CBLC                      | Cbl proto-oncogene, E3 ubiquitin protein ligase C                |
| 142 | 4.42 | ISL2                      | ISL LIM homeobox 2                                               |
| 143 | 4.40 | C16orf95                  | chromosome 16 open reading frame 95                              |
| 144 | 4.35 | KIAA0240                  | KIAA0240                                                         |
| 145 | 4.29 | NADKD1                    | NAD kinase domain containing 1                                   |
| 146 | 4.19 | MYO5C                     | myosin VC                                                        |
| 147 | 4.15 | MAN2A1                    | mannosidase, alpha, class 2A, member 1                           |
| 148 | 4.15 | C18orf32///RPL17-C18ORF32 | chromosome 18 open reading frame 32///RPL17-C18orf32 readthrough |
| 149 | 4.14 | F11R                      | F11 receptor                                                     |
| 150 | 4.12 | PPP3CC                    | protein phosphatase 3, catalytic subunit, gamma isozyme          |
| 151 | 4.10 | IGIP                      | IgA-inducing protein homolog (Bos taurus)                        |
| 152 | 4.04 | ESYT2                     | extended synaptotagmin-like protein 2                            |
| 153 | 3.97 | MTCH1                     | mitochondrial carrier 1                                          |
| 154 | 3.91 | DOCK9                     | dedicator of cytokinesis 9                                       |
| 155 | 3.91 | FKBP9                     | FK506 binding protein 9, 63 kDa                                  |
| 156 | 3.80 | FTH1                      | ferritin, heavy polypeptide 1                                    |

|     |      |                |                                                                                              |
|-----|------|----------------|----------------------------------------------------------------------------------------------|
| 157 | 3.78 | PLA2G12A       | phospholipase A2, group X1IA                                                                 |
| 158 | 3.75 | RABGAP1L       | RAB GTPase activating protein 1-like                                                         |
| 159 | 3.74 | MTR            | 5-methyltetrahydrofolate-homocysteine methyltransferase                                      |
| 160 | 3.67 | S100A10        | S100 calcium binding protein A10                                                             |
| 161 | 3.53 | TES            | testis derived transcript (3 LIM domains)                                                    |
| 162 | 3.47 | FAM177A1       | family with sequence similarity 177, member A1                                               |
| 163 | 3.45 | PERP           | PERP, TP53 apoptosis effector                                                                |
| 164 | 3.44 | PLEKHA1        | pleckstrin homology domain containing, family A (phosphoinositide binding specific) member 1 |
| 165 | 3.43 | RAB17          | RAB17, member RAS oncogene family                                                            |
| 166 | 3.35 | C1orf172       | chromosome 1 open reading frame 172                                                          |
| 167 | 3.34 | ADI1           | acireductone dioxygenase 1                                                                   |
| 168 | 3.30 | BCL2L11        | BCL2-like 11 (apoptosis facilitator)                                                         |
| 169 | 3.29 | SUN1           | Sad1 and UNC84 domain containing 1                                                           |
| 170 | 3.24 | AKTIP          | AKT interacting protein                                                                      |
| 171 | 3.23 | MARVELD3       | MARVEL domain containing 3                                                                   |
| 172 | 3.23 | ABCC10         | ATP-binding cassette, sub-family C (CFTR/MRP), member 10                                     |
| 173 | 3.15 | PPP1R21        | protein phosphatase 1, regulatory subunit 21                                                 |
| 174 | 3.14 | DSG2           | desmoglein 2                                                                                 |
| 175 | 3.13 | PHKB           | phosphorylase kinase, beta                                                                   |
| 176 | 3.11 | FTH1P5         | ferritin, heavy polypeptide 1 pseudogene 5                                                   |
| 177 | 3.06 | MBP            | myelin basic protein                                                                         |
| 178 | 2.97 | GCLC           | glutamate-cysteine ligase, catalytic subunit                                                 |
| 179 | 2.96 | ALDH3A2        | aldehyde dehydrogenase 3 family, member A2                                                   |
| 180 | 2.96 | TCEB3          | transcription elongation factor B (SIII), polypeptide 3 (110kDa, elongin A)                  |
| 181 | 2.95 | JRKL           | jerky homolog-like (mouse)                                                                   |
| 182 | 2.91 | GFPT1          | glutamine--fructose-6-phosphate transaminase 1                                               |
| 183 | 2.83 | FAM149B1       | family with sequence similarity 149, member B1                                               |
| 184 | 2.78 | DDR1///MIR4640 | discoidin domain receptor tyrosine kinase 1///microRNA 4640                                  |
| 185 | 2.75 | RALGAPA1       | Ral GTPase activating protein, alpha subunit 1 (catalytic)                                   |
| 186 | 2.75 | PLEKHG4        | pleckstrin homology domain containing, family G (with RhoGef domain) member 4                |
| 187 | 2.72 | CRB3           | crumbs homolog 3 (Drosophila)                                                                |
| 188 | 2.72 | OTUD1          | OTU domain containing 1                                                                      |
| 189 | 2.65 | P4HTM          | prolyl 4-hydroxylase, transmembrane (endoplasmic reticulum)                                  |
| 190 | 2.45 | EPM2A          | epilepsy, progressive myoclonus type 2A, Lafora disease (laforin)                            |
| 191 | 2.42 | BOD1L1         | biorientation of chromosomes in cell division 1-like 1                                       |
| 192 | 2.42 | ATG10          | autophagy related 10                                                                         |
| 193 | 2.40 | UQCRC2         | ubiquinol-cytochrome c reductase core protein II                                             |
| 194 | 2.39 | MED23          | mediator complex subunit 23                                                                  |
| 195 | 2.32 | COBL           | cordon-bleu homolog (mouse)                                                                  |
| 196 | 2.29 | YTHDC2         | YTH domain containing 2                                                                      |
| 197 | 2.28 | PTP4A1         | protein tyrosine phosphatase type IVA, member 1                                              |
| 198 | 2.27 | SLC39A9        | solute carrier family 39 (zinc transporter), member 9                                        |
| 199 | 2.26 | VGLL4          | vestigial like 4 (Drosophila)                                                                |

|     |      |          |                                                              |
|-----|------|----------|--------------------------------------------------------------|
| 200 | 2.26 | LAMA5    | laminin, alpha 5                                             |
| 201 | 2.26 | ATXN10   | ataxin 10                                                    |
| 202 | 2.22 | PIK3CB   | phosphoinositide-3-kinase, catalytic, beta polypeptide       |
| 203 | 2.22 | IVNS1ABP | influenza virus NS1A binding protein                         |
| 204 | 2.16 | STX17    | syntaxin 17                                                  |
| 205 | 2.16 | DNAJC1   | DnaJ (Hsp40) homolog, subfamily C, member 1                  |
| 206 | 2.14 | SLC30A6  | solute carrier family 30 (zinc transporter), member 6        |
| 207 | 2.08 | RNF13    | ring finger protein 13                                       |
| 208 | 2.08 | VPS35    | vacuolar protein sorting 35 homolog ( <i>S. cerevisiae</i> ) |
| 209 | 2.06 | ISOC1    | isochorismatase domain containing 1                          |
| 210 | 2.05 | RNF34    | ring finger protein 34, E3 ubiquitin protein ligase          |
| 211 | 2.03 | WDR11    | WD repeat domain 11                                          |
| 212 | 2.03 | CEP63    | centrosomal protein 63kDa                                    |

**Supplementary Table S7 : Methylation data from the cell lines\***

| Gene          | Expression status in RK | RK0         | Other cell lines |         |      |       |        |      | Average other cell lines |
|---------------|-------------------------|-------------|------------------|---------|------|-------|--------|------|--------------------------|
|               |                         |             | LoVo             | LIM1215 | KM12 | HCT15 | HCT116 | HCA7 |                          |
| <b>CMTM3</b>  | up                      | <b>0.41</b> | 0.88             | 0.91    | 0.94 | 0.90  | 0.84   | 0.99 | <b>0.91</b>              |
| <b>EpCAM</b>  | down                    | <b>1.2</b>  | 0.13             | 0.11    | 0.14 | 0.11  | 0.14   | 0.13 | <b>0.13</b>              |
| <b>KLK10</b>  | down                    | <b>0.49</b> | 0.08             | 0.22    | 0.05 | 0.03  | 0.04   | 0.25 | <b>0.11</b>              |
| <b>DLC_i4</b> | up                      | <b>0.06</b> | 0.82             | 0.53    | 0.05 | 0.05  | 0.85   | 0.10 | <b>0.40</b>              |
| <b>DLC1</b>   |                         | <b>0.03</b> | 1.17             | 0.16    | 0.05 | 0.05  | 0.86   | 0.00 | <b>0.38</b>              |

\*some data were missing for the two genes DGKI and OPCML because of technical problems and unreliability
